# Supplementary material for: Positive Effects of Fast Growth on Locomotor Performance in Pelagic Fish Juveniles: In Contrast to Existing Evidence
Source: Research Square preprint supplement (doi:10.21203/rs.3.rs-745832/v1), 2021-09-03
Supplement: Supplementary file 1 [file 58fb71a7acb004108d52c853.docx]

**Table S2: Summary of results of a generalized linear mixed model (GLMM) and Wald’s test used to examine whether routine speed was significantly affected by standard length (SL), growth rate, and alizarin complexone (ALC) marking.** The GLMM was based on a Gamma distribution. It contained SL, growth rate, and ALC marking as fixed effects and individual ID and rearing tank as random effects. VIF = variance inflation factor, SE = standard error

| Fixed effect | VIF | Estimate | SE | z value | *P* value |
| --- | --- | --- | --- | --- | --- |
| SL | 1.75 | 0.033 | 0.017 | 1.909 | 0.056 |
| growth rate | 1.74 | -0.166 | 0.297 | -0.560 | 0.575 |
| ALC marking | 1.01 | -0.039 | 0.067 | -0.573 | 0.567 |
|  |  |  |  |  |  |
| Random effects | variance | SD |  |  |  |
| individual id | 0.05 | 0.23 |  |  |  |
| rearing tank | < 0.01 | < 0.01 |  |  |  |
